# Supplementary material for: Efficient catalyst-free N2 fixation by water radical cations under ambient conditions
Source: Springer Nature journal article supplement (doi:10.1038/s41467-024-45832-9), 2024-02-20
Supplement: MOESM1 [file 41467_2024_45832_MOESM1_ESM.pdf]

# Supplementary Information

## Efficient catalyst-free N<sub>2</sub> fixation by water radical cations under ambient conditions

Xiaoping Zhang<sup>1</sup>, Rui Su<sup>2,3</sup>, Jingling Li<sup>1</sup>, Liping Huang<sup>2</sup>, Wenwen Yang<sup>1</sup>, Konstantin Chingin<sup>2</sup>, Roman Balabin<sup>2</sup>, Jingjing Wang<sup>2</sup>, Xinglei Zhang<sup>1</sup>, Weifeng Zhu<sup>2</sup>, Keke Huang<sup>3</sup>, Shouhua Feng<sup>3</sup>, Huanwen Chen<sup>1,2\*</sup>

<sup>1</sup>Jiangxi Key Laboratory for Mass Spectrometry and Instrumentation, East China University of Technology, Nanchang, 330013, P. R. China

<sup>2</sup>School of Pharmacy, Jiangxi University of Chinese Medicine, Nanchang, 330004, P. R. China

<sup>3</sup>State Key Laboratory of Inorganic Synthesis and Preparative Chemistry, College of Chemistry, Jilin University, Changchun 130012, P. R. China

**Email: chw8868@gmail.com**

16  
17  
18  
19  
20  
21  
22  
23  
24  
25  
26  
27  
28  
29  
30  
31  
32  
33  
34  
35  
36  
37

## Table of Contents

|                                                                             |     |
|-----------------------------------------------------------------------------|-----|
| 1. Supplementary Note 1: Theoretical calculations.....                      | 3-6 |
| 2. Supplementary Note 2: Calculation results in Table 1.....                | 6-7 |
| 3. Supplementary Note 3: Calculation of N <sub>2</sub> conversion rate..... | 7   |
| 4. Supplementary Note 4: Calculation results in Table 2.....                | 7-8 |
| Supplementary Figure 1.....                                                 | 9   |
| Supplementary Figure 2.....                                                 | 10  |
| Supplementary Figure 3.....                                                 | 11  |
| Supplementary Figure 4.....                                                 | 12  |
| Supplementary Figure 5.....                                                 | 13  |
| Supplementary Figure 6.....                                                 | 14  |
| Supplementary Figure 7.....                                                 | 15  |
| Supplementary Figure 8.....                                                 | 16  |
| Supplementary Figure 9.....                                                 | 17  |
| Supplementary Figure 10.....                                                | 18  |
| Supplementary Figure 11.....                                                | 19  |
| Supplementary Figure 12.....                                                | 20  |
| Supplementary Figure 13.....                                                | 21  |
| Supplementary Figure 14.....                                                | 22  |
| Supplementary Figure 15.....                                                | 23  |
| Supplementary reference.....                                                | 24  |

## 38 **1. Supplementary Note 1: Theoretical calculations**

39 Most theoretical calculations were performed using the Gaussian 16 electronic structure  
40 programs <sup>1</sup>. ORCA quantum chemistry program package (v5.0.4) was used for fractional  
41 occupation number weighted electron density (FOD) analysis <sup>2</sup>.

42 The geometries of reactants, intermediates and products were optimized at dispersion-  
43 corrected density functional theory level (DFT-D) with closed- and open-shell virtual orbital-  
44 dependent functional as introduced by Grimme (B2PLYP, commonly referred to as B2-PLYP),  
45 which uses more than half of exact exchange energy <sup>3,4</sup>. We used the modification of this  
46 functional by Martin (B2GP-PLYP) that is expected to be capable of 2 kcal mol<sup>-1</sup> quality  
47 thermochemistry and to be robust toward non-dynamical electron correlation <sup>5</sup>. To estimate the  
48 practical uncertainty of our electronic energy differences, we also used the revised version of  
49 DSD-PBEP86 functional with Grimme's GD3BJ empirical dispersion correction <sup>6</sup>: relative  
50 energy differences  $\approx 0.12$  eV were observed during this comparison.

51 Complex Dunning's correlation consistent basis sets of triple and quadruple quality were  
52 used to build molecular orbitals: one of Truhlar's triple-zeta "calendar" basis sets (may-cc-pVTZ)  
53 was applied for a preliminary optimization <sup>7</sup>, while Weigend's modification of Ahlrichs and  
54 coworkers quadruple-zeta basis set (def2-QZVPP) was used for the final geometry optimization  
55 and vibrational analysis <sup>4</sup>. Fully augmented Dunning's correlation consistent quadruple-zeta basis  
56 set (aug-cc-pVQZ) was also used for geometry optimization to test whether basis set limit (BSL)  
57 was practically reached <sup>8,9</sup>: negligible differences in B2GP-PLYP and DSD-PBEP86 geometries  
58 were observed.

59 Force constants and the resulting vibrational frequencies were obtained at "very tightly"  
60 converged geometries with RMS force threshold of  $10^{-6}$  Hartree Bohr<sup>-1</sup>. Pruned "ultra-fine" grids

61 with 99 radial shells and 590 angular points per shell were used for all calculations. Vibrational  
62 frequencies of all the key species were calculated at the same level of theory to obtain the Gibbs  
63 free energies corrections to their electronic energies at 298.15 K in rigid rotor – harmonic  
64 oscillator (RRHO) approximation.

65 Final electronic energies of B2GP-PLYP geometries were calculated at CCSD(T)/CBS level.  
66 Valence focal-point analysis of Schaefer<sup>10,11</sup> was applied to reach the complete basis set limit  
67 (CBS): Hartree-Fock (HF) energies were extrapolated to BSL by exponential formula, while a  
68 two-parameter polynomial formula ( $X^{-3}$ ) was used for extrapolation of electron correlation  
69 corrections ( $\delta\text{CCSD(T)}$ ). As expected from numerous recent benchmark studies, a difference of  
70  $\approx 0.10$  eV was observed between CCSD(T)/CBS and B2GP-PLYP/aug-cc-pVQZ data with the  
71 exception of  $(\text{H}_2\text{O})_2^+$  conformations (see below). Because our systems included only period two  
72 elements, core correlation shifts and relativistic corrections were estimated to be negligible<sup>12</sup>.

73 The same cannot be said about multi-reference character of our systems with TS being the  
74 most problematic case. A set of methods – spin contamination at the UHF level as estimated by  
75 the relative deviation from the expected  $\langle S^2 \rangle$  value, the low speed of SCF convergence,  $T_1$   
76 diagnostics ( $>0.035$ ) and FOD analysis (see Supplementary Figure 3) with different density  
77 functionals – agrees that our proposed TS for double proton transfer has a large contribution  
78 from static (non-dynamical) electron correlation, as regularly happens with biradicals or certain  
79 classes of transition-metal complexes<sup>13,14</sup>. So, appearance of many equally important  
80 determinants in electronic wave functions is expected. While CCSD(T) with large basis set  
81 usually provides reliable reaction energies (accuracy better than 1 kcal mol<sup>-1</sup>) for single-reference  
82 molecules, we cannot reasonably conjecture the same accuracy for this particular molecular  
83 system.

84 This precludes us from drawing a precise conclusion about TS position on the energy  
85 diagram.

86 Highly parameterized Minnesota global hybrid functional from Truhlar with 54% of HF  
87 exchange (M06-2X) and  $\tau$ -dependent meta-gradient-corrected (meta-GGA) functional of Tao,  
88 Perdew, Staroverov, and Scuseria (TPSS, commonly referred to as TPSSSTPSS) were used to  
89 further estimate the uncertainty of quantum chemical calculations<sup>15</sup>. Modification of  
90 PBE0/PBE1PBE density functional by setting its exact exchange energy to 7.5% was also tested.

91 Our choice of virtual orbital-dependent functionals was determined by a comparison with  
92 available experimental data in literature<sup>16</sup>. Dinitrogen ( $N_2$ ) represents an example of complicated  
93 electronic system with large static electron correlation (also known as “strongly correlated  
94 system”<sup>17</sup>). Therefore, popular DFT functionals (B3LYP, PBE0, TPSS,  $\omega$ B97X, etc.) are not  
95 applicable to  $N_2$ , while B2PLYP and its analogues are able to precisely reproduce the  
96 experimental data. For example, the bond length and harmonic frequency ( $\omega_e$ ) of the ground-  
97 state singlet  $N_2$  ( $X^1\Sigma_g^+$ ) calculated by B2PLYP are 109.78 pm and 2346  $cm^{-1}$ , accordingly.  
98 These numbers are highly consistent with the experimental values of 109.77 pm and 2359  $cm^{-1}$ .  
99 For comparison, the same results for B3LYP functional are less accurate: 109.01 pm and 2448  
100  $cm^{-1}$ . The dispersion-corrected functional from Head-Gordon ( $\omega$ B97XD/wB97XD) is even less  
101 accurate: 108.72 pm and 2490  $cm^{-1}$ . The same conclusion holds for the triplet  $N_2$  ( $A^3\Sigma_u^+$  and B  
102  $^3\Pi_g$  states) as well as for the ground doublet state of  $N_2^+$  ( $X^2\Sigma_g^+$ ).

103 To further test our selection of quantum chemical methodology we have compared our  
104 results for HNO ( $X^{\sim 1}A'$ ) with the recent best single-reference WFT estimations available in  
105 literature. Due to low stability of HNO molecules, experimental data are not as reliable as needed  
106 for a direct comparison<sup>12</sup>. The same trend as with  $N_2$  was confirmed: while B2GP-PLYP/DSD-

107 PBEP86 geometries were found to be almost indistinguishable (0.1-0.4 pm, 12-15 cm<sup>-1</sup>) from  
108 CCSD(T)/cc-pCVQZ structures of Schaefer, B3LYP/PBE0/M06-2X geometries were not that  
109 accurate (1.0-1.3 pm, 56-64 cm<sup>-1</sup>). The same conclusion holds for a triplet HNO state ( $\tilde{a}^3A''$ ) as  
110 well as for a doublet NO ( $X^2\Pi$ ) where comparison with exact experimental data is possible.

111 Water dimer radical cation was also studied at CCSD(T)/aug-cc-pVQZ level by Schaefer  
112 and colleagues<sup>18</sup>. We used these values as a reference point. In case of (H<sub>2</sub>O)<sub>2</sub><sup>+</sup> hemibonded  
113 structure only O..O distance was found to be sensitive to density functional choice: virtual  
114 orbital-dependent functionals show 2.6-3.2 pm deviation from the WFT value, while  
115 B3LYP/PBE0/wB97XD/PW6B95D3/M06-2X geometries are too loose by 6.0-9.4 pm. Other  
116 geometrical parameters are hardly distinguishable for all the methods tested and are close to  
117 WFT ones. Unfortunately, inclusion of virtual orbitals into DFT paradigm does not help to  
118 reproduce the CCSD(T) relative energies of different (H<sub>2</sub>O)<sub>2</sub><sup>+</sup> conformations: B2GP-PLYP/def2-  
119 QZVPP value of 0.64 eV for energy difference between hemibonded and H-bonded structures is  
120 hardly comparable with our value of 0.33 eV at CCSD(T)/CBS level or 0.31 eV from Schaefer.

## 121 **2. Supplementary Note 3: Calculation results in Table 1**

122 Note that the dimensions of the plate for the discharge needle array were measured as ~ 3.5  
123 cm × 5.5 cm, and thus the given area for the plate was about 19.25 cm<sup>2</sup>. However, the effective  
124 discharge occurred only at the tip of the needles, which were evenly distributed on the total  
125 surface of the plate, *i.e.*, 19.25 cm<sup>2</sup>.

126 Consequently, it could be expected that the water cluster radical cations (H<sub>2</sub>O)<sub>2</sub><sup>+</sup> would be  
127 mainly produced right at the tip of the needle, which was roughly estimated as a small ball<sup>19</sup>  
128 with a sharp tip. Using a high-magnification electron microscope, the tip of the tungsten needle  
129 observed was spherically shaped, and the diameter of the needle tip was measured to be ≤ 0.06  
130 mm. Take the max value of the diameter (0.06 mm, *i.e.*, (6 × 10<sup>-3</sup> cm) for estimation of the  
131 surface area, and then according to the ball area ( $\pi D^2$ ), the tip surface area was less than 3.14 ×

132  $6^2 \times 10^{-6} \text{cm}^2 = 113.04 \times 10^{-6} \text{cm}^2$ . Note that only about half area of the tip was exposed to the  
133 water vapor for reaction, thus the  $S$  was estimated as  $0.5 \times 113.04 \times 10^{-6} \text{cm}^2 = 5.65 \times 10^{-5} \text{cm}^2$ .  
134 Accordingly, the total effective area surface of the 76 needles in the array was about  $4.29 \times 10^{-3}$   
135  $\text{cm}^2$ .

136 Thus, the actual yield achieved for  $\text{NH}_2\text{OH}$  should be between the  $\text{yield}_{\text{max}} \approx 5.10 \times 10^3 \mu\text{g}$   
137  $\text{cm}^{-2} \text{h}^{-1}$  (calculated based on the total effective area of 76 needles) and  $\text{yield}_{\text{min}} \approx 1.14 \mu\text{g cm}^{-2} \text{h}^{-1}$   
138 (calculated based on total plate area). Accordingly, the yield achieved for HNO should be  
139 between the  $\text{yield}_{\text{max}} \approx 1.53 \times 10^3 \mu\text{g cm}^{-2} \text{h}^{-1}$  (calculated based on the total effective area of 76  
140 needles) and  $\text{yield}_{\text{min}} \approx 0.37 \mu\text{g cm}^{-2} \text{h}^{-1}$  (calculated based on the total plate area).

141 The product prices are calculated according to the quotation on Sigma-Aldrich official  
142 website. For example, the product price of  $\text{NH}_3 \text{H}_2\text{O}$  (~30%) is 30 \$ per 500 mL, that is 0.06 \$  $\text{g}^{-1}$ .  
143 The product price of  $\text{NH}_2\text{OH}$  is about 10 \$  $\text{g}^{-1}$ . The product price of Angeli's (AS) salt (a  
144 source to generate HNO) is 30 \$  $\text{mg}^{-1}$ . As the molar mass ratio of HNO and AS is 1:5 and 1 mol  
145 AS salt can release 1 mol HNO in theory, thus, the estimated product price of HNO is about 150  
146 \$  $\text{mg}^{-1}$ .

147

### 148 3. Supplementary Note 2: Calculation of $\text{N}_2$ conversion rate

149 **Conversion rate** =  $\frac{C(\text{NH}_3 + \text{NH}_2\text{OH} + \text{NO}_2^- + \text{NO}_3^- + \text{HNO}) \text{ mol/L}}{10 \text{ min}} \times \frac{6 \text{ mL}}{1000 \text{ mL/L}} \times 24.5 \text{ L/mol} \times$

150  $\frac{1}{\text{FR L/min}} \times 100\%$ , where FR is the flow rate of the gas with  $0.1 \text{ L min}^{-1}$ . This is based on the

151 assumption that all  $\text{N}_2$  fixation products are converted to  $\text{NH}_2\text{OH}$ , HNO,  $\text{NH}_3$ ,  $\text{NO}_2^-$  and

152  $\text{NO}_3^-$ . In detail,  $C(\text{NH}_2\text{OH}) = 0.019 \text{ mmol L}^{-1}$ ,  $C(\text{HNO}) = 0.018 \text{ mmol L}^{-1}$ ,  $C(\text{NH}_3) = 0.02$

153  $\text{mmol L}^{-1}$ ,  $C(\text{NO}_2^-) = 0.004 \text{ mmol L}^{-1}$ ,  $C(\text{NO}_3^-) = 0.007 \text{ mmol L}^{-1}$ .

### 154 4. Supplementary Note 4: Calculation results in Table 2

155 The energy cost is calculated according to the equations: the power  $W = U \times I \times t$  (1) and the  
156 energy cost =  $W/n$  (2), where  $W$  is the power,  $U$  is the discharge voltage,  $I$  is the ion current,  $t$  is  
157 the reaction time,  $n$  is the molar mass of the product. For example, at  $U = 4.2 \text{ kV}$ ,  $I = 0.031 \text{ mA}$ ,  $t$   
158 = 10 min the amount of produced  $\text{NH}_2\text{OH}$  is ca.  $3.372 \mu\text{g}$  (about  $0.102 \mu\text{mol}$ ). The power

159 consumed over 10 min is about  $4.2 \text{ kV} \times 0.031 \text{ mA} \times 1/6 \text{ h} = 78.12 \text{ J}$ . The energy cost is about  
160  $78.12 \text{ J} / 0.102 \text{ } \mu\text{mol} = 770 \text{ MJ mol}^{-1}$ .

161 The product prices are calculated according to the quotation on Sigma-Aldrich official  
162 website. For example, the product price of  $\text{NH}_3 \text{ H}_2\text{O}$  (~30%) is 30 \$ per 500 mL, that is  $0.06 \text{ } \text{g}^{-1}$ .  
163 The product price of  $\text{NH}_2\text{OH}$  is about  $10 \text{ } \text{g}^{-1}$ . The product price of Angeli's (AS) salt (a  
164 source to generate HNO) is  $30 \text{ } \text{mg}^{-1}$ . As the molar mass ratio of HNO and AS is 1:5 and 1 mol  
165 AS salt can release 1 mol HNO in theory, thus, the estimated product price of HNO is about  $150$   
166  $\text{ } \text{mg}^{-1}$ . The product price of  $\text{HNO}_3$  is about 3 \$ per 500g, that is  $\sim 0.006 \text{ } \text{g}^{-1}$ . Note that the  
167 economy efficiency for the catalytic methods does not account for the price of the catalyst.

168

169



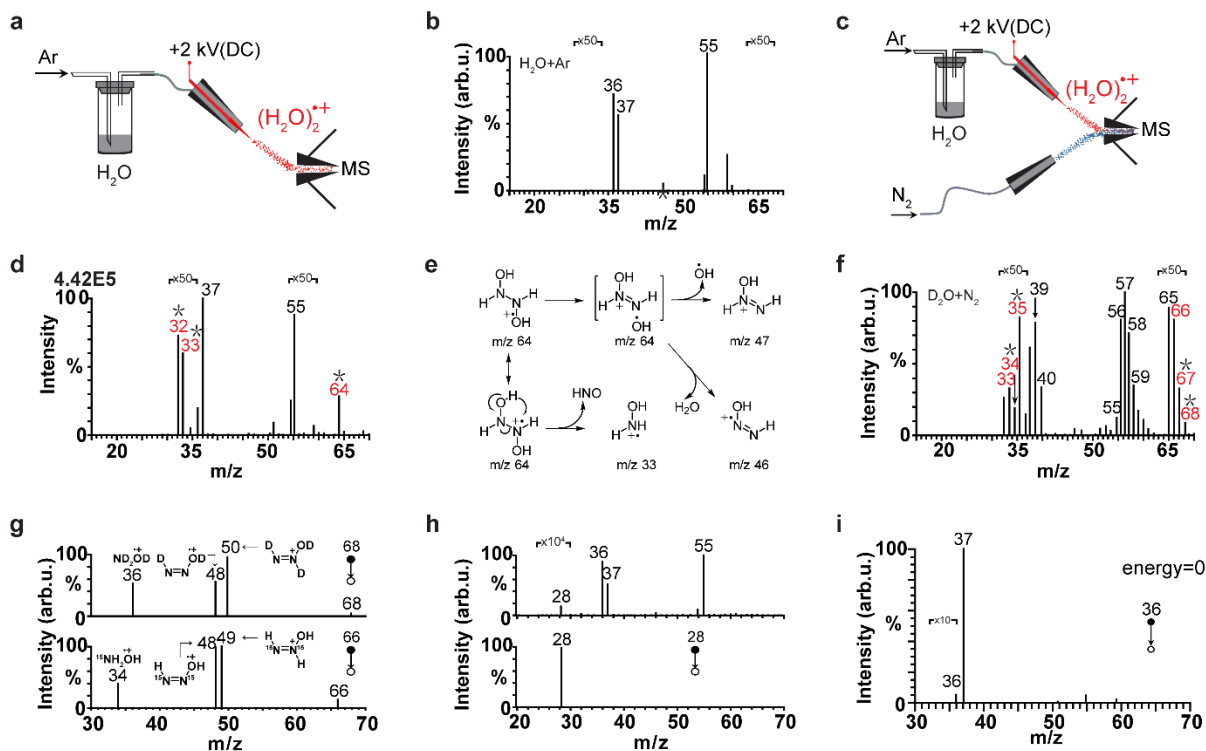

170

171 **Supplementary Figure 1. Reference experiments with regard to the reaction between N<sub>2</sub>**  
 172 **and water radical cations shown in Fig. 1a. a** Schematic illustration of the experiment in  
 173 which N<sub>2</sub> in Fig. 1a was replaced by Ar. The figure is adapted with permission from  
 174 Supplementary refs. 20-22. **b** Mass spectrum recorded in the experiments shown in  
 175 Supplementary Fig. 1a was replaced by Ar. **c** Experimental two-channel setup to study the  
 176 interaction of neutral N<sub>2</sub> with water radical cations by online mass spectrometry. The figure is  
 177 adapted with permission from Supplementary refs. 20-22. **d** Mass spectrum recorded in  
 178 Supplementary Fig. 1c. **e** Dissociation pathways of the HONH-HNOH<sup>+•</sup> intermediate *m/z* 64  
 179 formed under the conditions of Fig. 1a. **f** Mass spectrum recorded when H<sub>2</sub>O in the experiments  
 180 shown in Fig. 1a was replaced by D<sub>2</sub>O, other experimental conditions being the same. **g** Tandem  
 181 mass spectra of the HONH-HNOH<sup>+•</sup>-type intermediates revealed in the disproportionation  
 182 reaction of N<sub>2</sub> with (H<sub>2</sub>O)<sub>2</sub><sup>+•</sup> using different isotopic substitutes: *m/z* 68 (DOND-DNOD<sup>+•</sup>) and  
 183 *m/z* 66 (HO<sup>15</sup>NH-H<sup>15</sup>NOH<sup>+•</sup>). **h** Mass spectrum of N<sub>2</sub><sup>+•</sup> (corresponding signal at *m/z* 28) in the  
 184 presence of neutral water vapor in the ion trap. No signals at *m/z* 64 (HONH-HNOH<sup>+•</sup>), *m/z* 32  
 185 (HNOH<sup>+•</sup>) or *m/z* 33 (NH<sub>2</sub>OH<sup>+•</sup>) could be observed under any experimental conditions tested,  
 186 even by applying collision energy to the isolated N<sub>2</sub><sup>+•</sup> ions (isolation width of 5 Da; the activation  
 187 *Q* value of 0.4). **i** Isolation of ions at *m/z* 36 inside the ion trap with zero collisional activation  
 188 energy. Asterisks correspond to the products specific to the reaction between water (D<sub>2</sub>O) vapor  
 189 and N<sub>2</sub>.

190

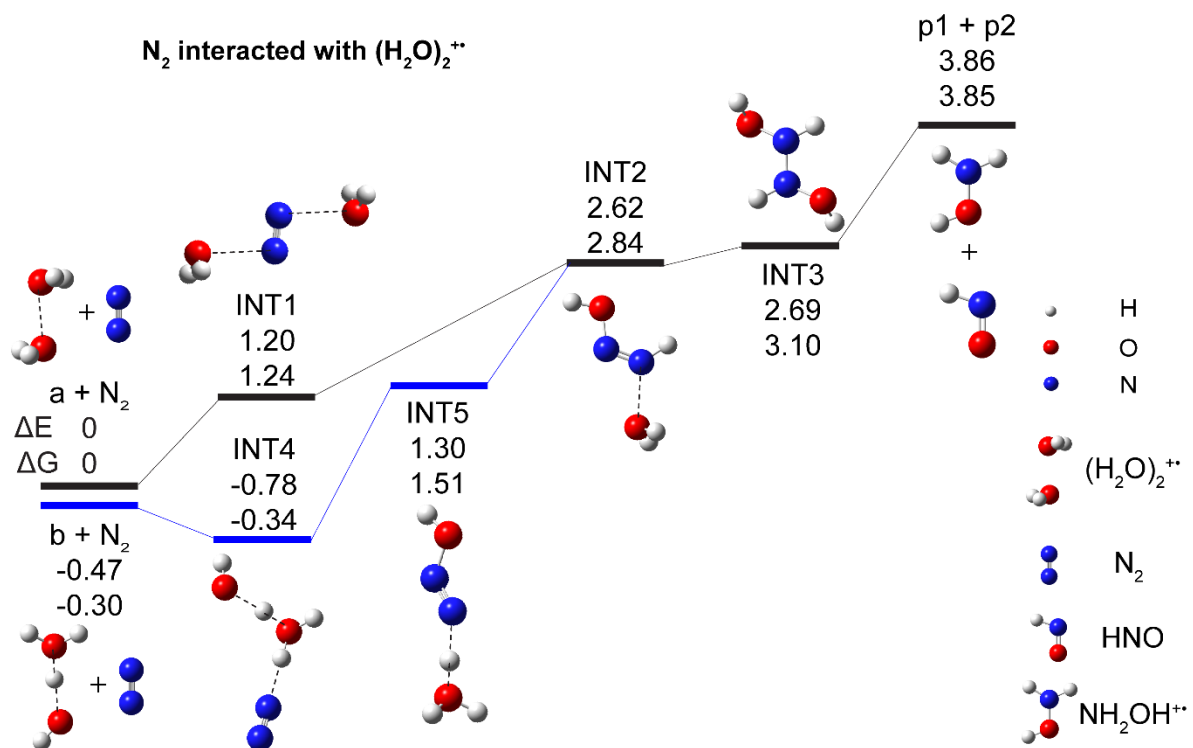

191  
 192 **Supplementary Figure 2. The ground-state geometries and energies (in eV at 298 K and 1**  
 193 **atm pressure) of proposed molecular and ionic species involved in the disproportionation**  
 194 **reaction N<sub>2</sub> + (H<sub>2</sub>O)<sub>2</sub><sup>++</sup> → NH<sub>2</sub>OH<sup>++</sup> + HNO calculated with with CCSD(T) method. a:**  
 195 **[H<sub>2</sub>O...OH<sub>2</sub>]<sup>+</sup>. b: [H<sub>3</sub>O<sup>+</sup>...OH]. p1: NH<sub>2</sub>OH<sup>++</sup>. p2: HNO.**  
 196

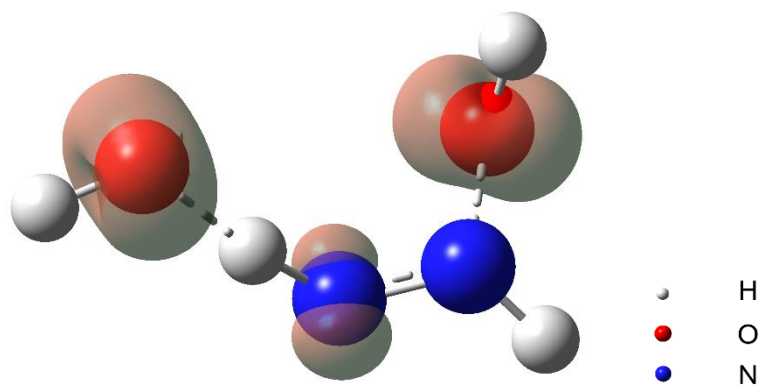

197

198 **Supplementary Figure 3. Fractional occupation number weighted electron density (FOD)**  
199 **that is plotted as an isosurface at  $\sigma=0.005$  e Bohr<sup>-3</sup> level.** TPSS/def2-TZVP at 5000 K data shows the  
200 “hot” (strongly correlated) electron density regions delocalized on the proposed TS system ( $N^{\text{FOD}} > 0.65$ ).  
201

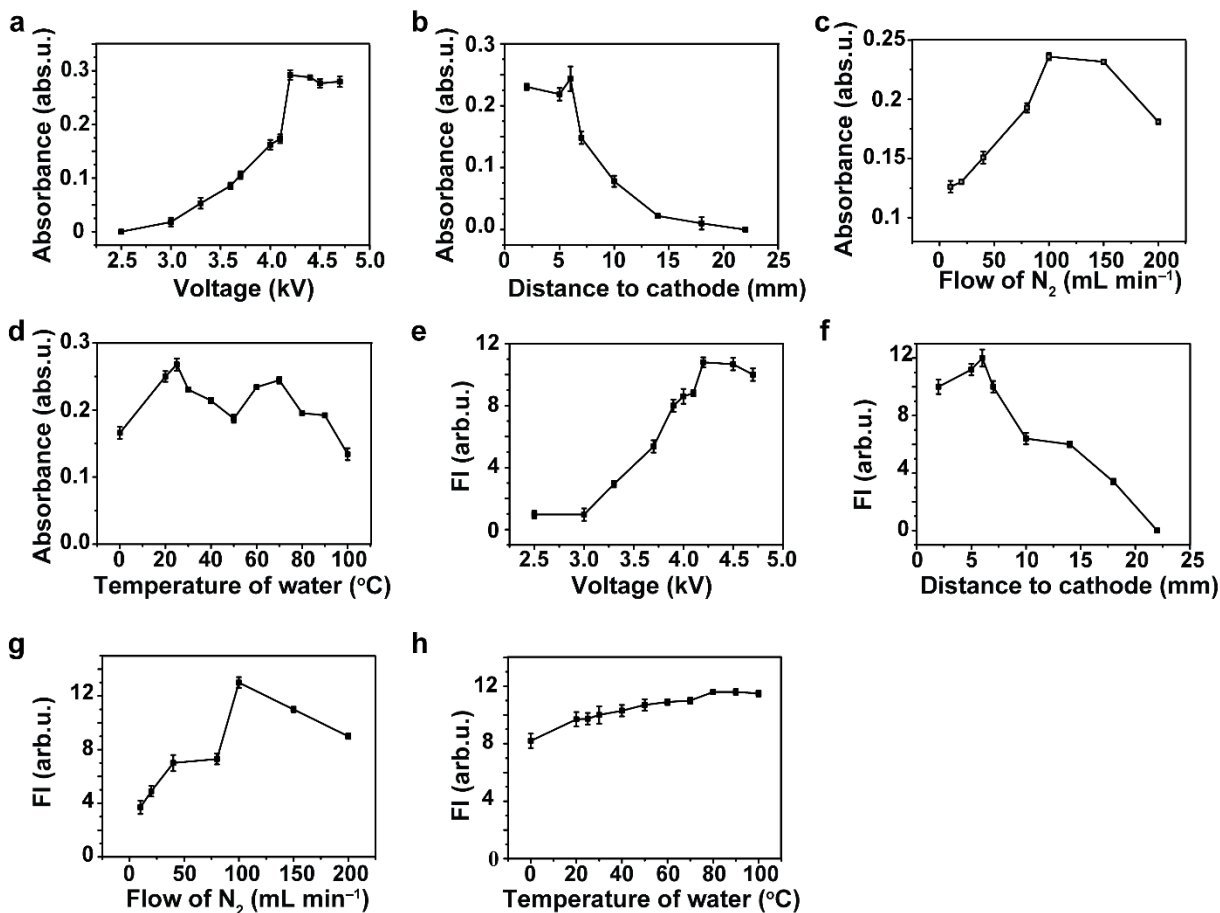

203  
 204 **Supplementary Figure 4. The intensity of NH<sub>2</sub>OH (a-d) and HNO (e-h) signal depending on**  
 205 **experimental parameters: a, e** The voltage of needle array. **b, f** Distance from the needle tip to  
 206 the surface of the solution in cathode. **c, g** Flow rate of N<sub>2</sub>. **d, h** Water temperature. The error  
 207 bars indicate the standard deviation (n=3).  
 208  
 209

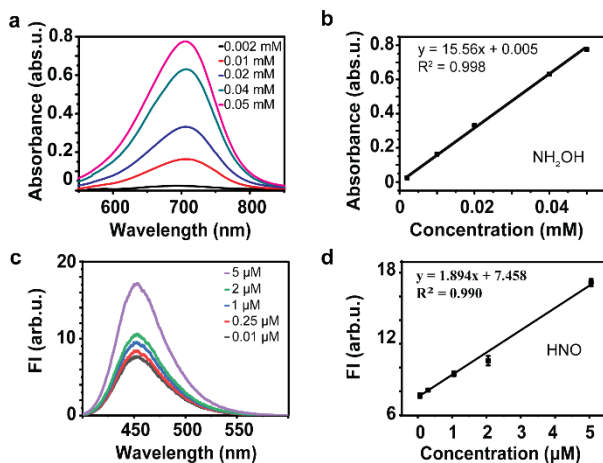

211  
212 **Supplementary Figure 5. Quantification of NH<sub>2</sub>OH and HNO by spectrophotometry. a** UV-  
213 Vis spectra of 8-quinolinol solution reacted with NH<sub>2</sub>OH at different concentrations. **b**  
214 Calibration curve of NH<sub>2</sub>OH. **c** Fluorescence emission spectra of P-CM solution reacted with  
215 HNO at different concentrations. **d** Calibration curve of HNO. The error bars indicate the  
216 standard deviation (n=3).

217  
218

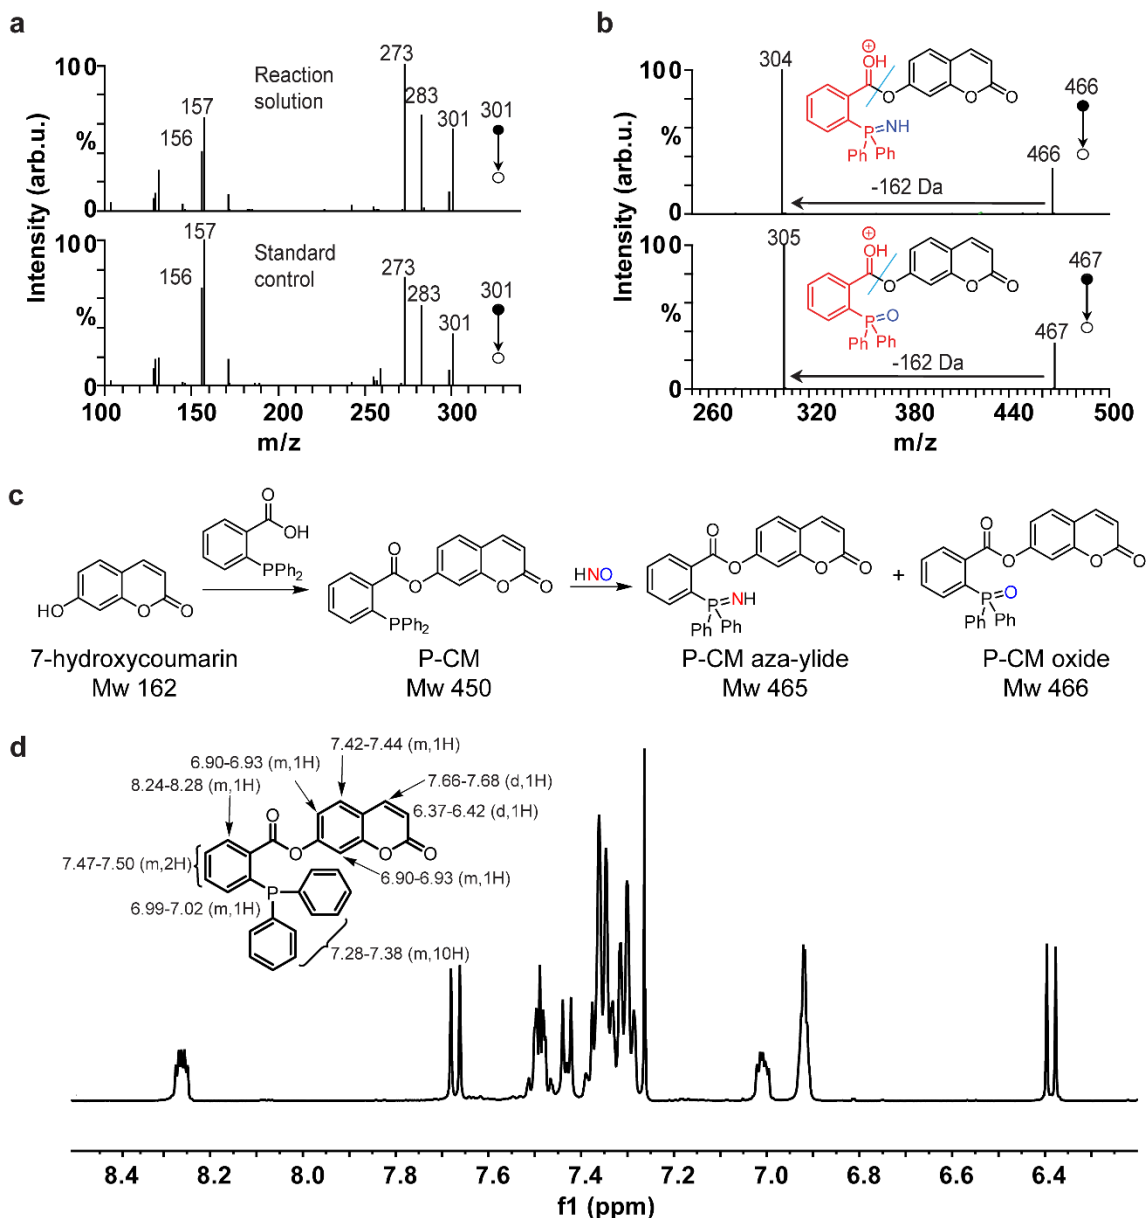

219  
 220 **Supplementary Figure 6. Validation of NH<sub>2</sub>OH and HNO products by spectral methods.**  
 221 Confirmation of indoxine formation in the reaction between the collected NH<sub>2</sub>OH and 8-  
 222 quinolinol by tandem MS. **b** Tandem MS characterization of P-CM-NH and P-CM-O products  
 223 formed by the reaction of P-CM with HNO in the collected reaction mixture. **c** The synthetic  
 224 route of P-CM probe and reaction process between P-CM probe and HNO<sup>23</sup>. **d** <sup>1</sup>H NMR  
 225 spectrum of the synthesized P-CM probe, which is consistent with earlier report<sup>23</sup>.  
 226

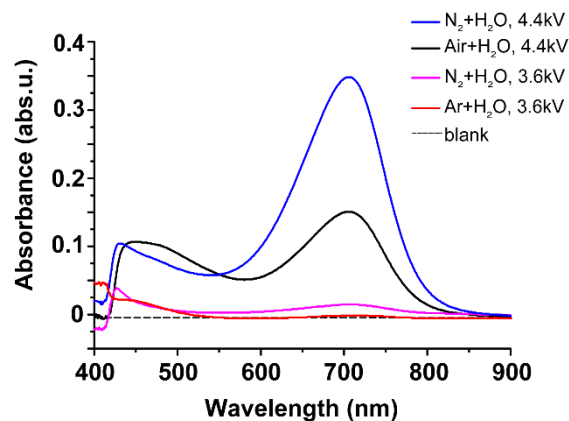

227

228 **Supplementary Figure 7. Reference UV-Vis spectra recorded for the NH<sub>2</sub>OH samples**  
 229 **collected using the scaled-up setup shown in Fig. 3a under different conditions.** The  
 230 reference measurements show that the NH<sub>2</sub>OH and HNO products were generated specifically  
 231 due to the reaction between N<sub>2</sub> and (H<sub>2</sub>O)<sub>2</sub><sup>++</sup>. The blank solution was 8-quinolinol solution (6 mL)  
 232 exposed to humidified Ar under the same experimental conditions for 10 min.

233

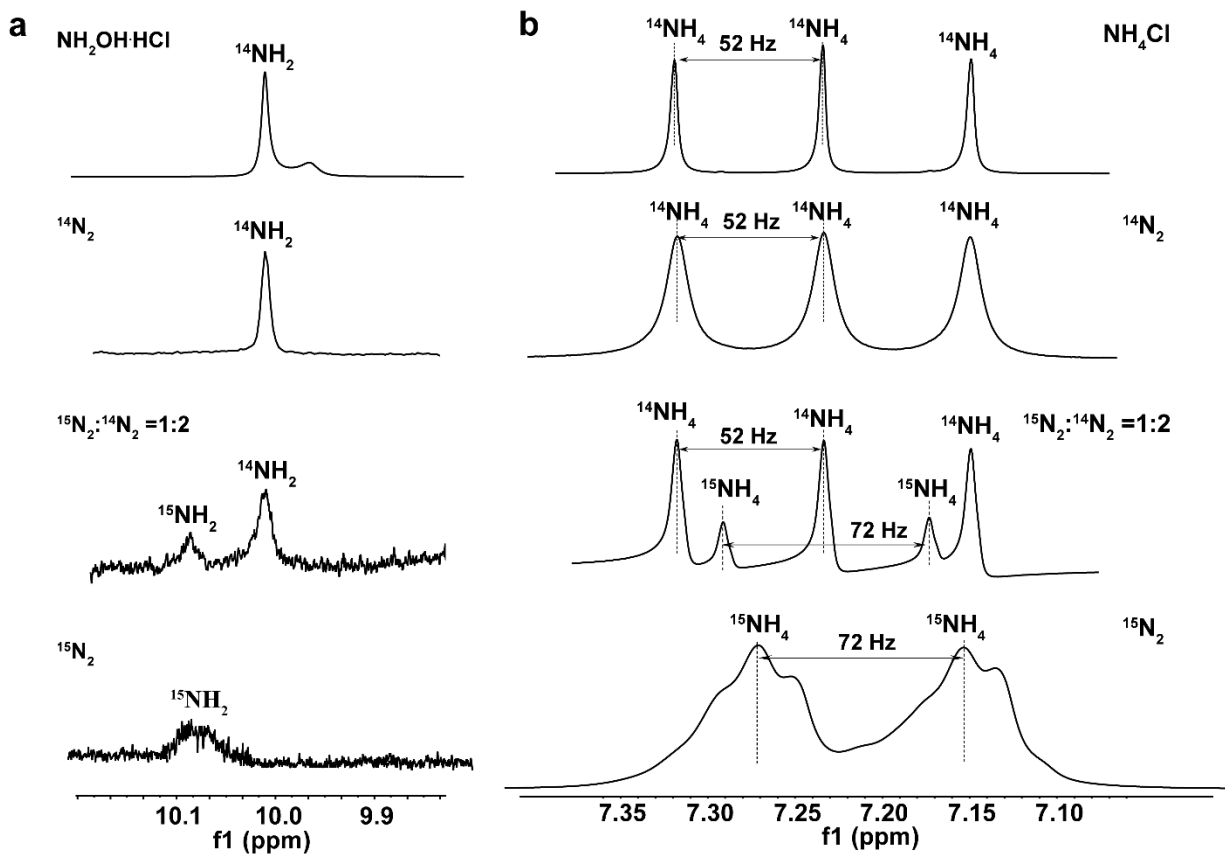

234

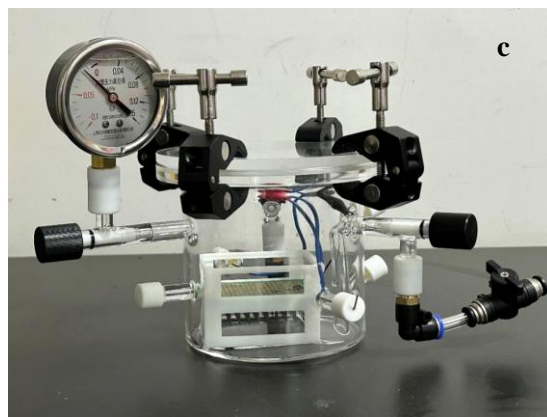

235

236 **Supplementary Figure 8. NMR spectroscopy of reaction products produced using  $^{14}\text{N}_2$  and**  
 237 **the  $^{15}\text{N}_2$  gas. a**  $\text{NH}_2\text{OH}$  product. **b**  $\text{NH}_4^+$  product. **c** Reaction device with enclosure. In order to  
 238 increase the efficiency of product formation and reduce the cost of isotope  $^{15}\text{N}_2$  gas, the  $^{15}\text{N}_2$  gas  
 239 was introduced into an enclosed container (Supplementary Figure 8c). For comparison, the  
 240 reference experiment with  $^{14}\text{N}_2$  gas was done under the same conditions. The  $^1\text{H}$  NMR spectrum  
 241 of  $^{14}\text{NH}_4^+$  product exhibited a typical triple peak with  $J = 52$  Hz, which matched the peak  
 242 generated by a standard  $\text{NH}_4\text{Cl}$ . When the mixture of  $^{15}\text{N}_2$ / $^{14}\text{N}_2$  or pure  $^{15}\text{N}_2$  was used as the  
 243 feeding gas, a double peak with  $J = 72$  Hz was observed, which was assigned to the  $^{15}\text{NH}_4^+$   
 244 product, similar to that reported by Hu et al. <sup>24</sup>.

245



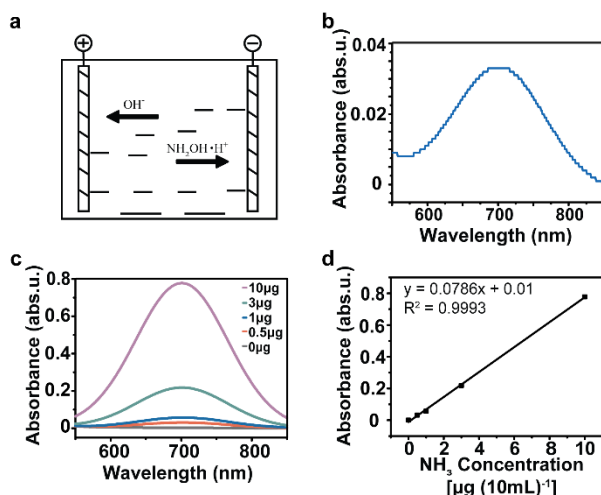

246  
 247 **Supplementary Figure 9. Electrochemical reduction of  $\text{NH}_2\text{OH}$  collected during  $\text{N}_2$**   
 248 **disproportionation and quantification of the  $\text{NH}_3$  product by UV-Vis spectrophotometry. a**  
 249 The device for  $\text{NH}_2\text{OH}$  reduction. **b** Determination of  $\text{NH}_3$  produced by the reduction of  
 250 collected  $\text{NH}_2\text{OH}$  using the indophenol blue method <sup>25</sup>. The concentration of  $\text{NH}_3$  product was  
 251 determined by UV-Vis spectrophotometry of indophenol blue formed upon the reaction of the  
 252 produced  $\text{NH}_3$  with salicylic acid. **c** Reference UV-Vis spectra of indophenol blue formed by the  
 253 reaction of salicylic acid with aqueous  $\text{NH}_3$  at different concentrations (weight per 10 mL of  
 254 solvent) of  $\text{NH}_4\text{Cl}$ . **d** Calibration curve built based on the data in **c**.  
 255

256  
257

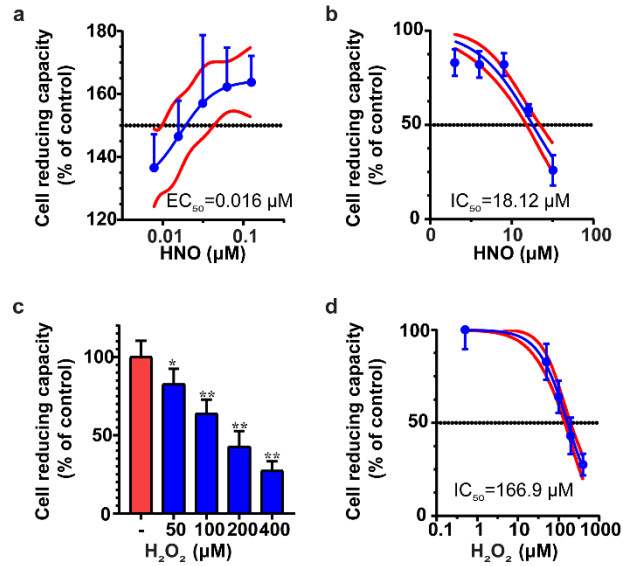

258

259 **Supplementary Figure 10. The effect of HNO on HT22 cell reducing capacity measured by**  
260 **Cell Counting Kit-8 assay. a** HT22 cell reducing capacity as a function of HNO concentration  
261 from 0.008  $\mu\text{M}$  to 0.125  $\mu\text{M}$ . The  $\text{EC}_{50}$  value of 0.016  $\mu\text{M}$  corresponds to HNO concentration at  
262 which 50% proliferative effect on HT22 cells is obtained. **b** HT22 cell reducing capacity as a  
263 function of HNO concentration from 2  $\mu\text{M}$  to 32  $\mu\text{M}$ . The  $\text{IC}_{50}$  value of 18.12  $\mu\text{M}$  corresponds to  
264 HNO concentration at which 50% damaging effect of HNO on HT22 cells is obtained. **c** Effect  
265 of  $\text{H}_2\text{O}_2$  concentration levels on the reducing capacity of HT22 cells measured by Cell Counting  
266 Kit-8 assay. \* $P < 0.05$  and \*\* $P < 0.01$  versus control. **d** The reducing capacity of HT22 cells as a  
267 function of  $\text{H}_2\text{O}_2$  concentration levels varied from 50  $\mu\text{M}$  to 400  $\mu\text{M}$ ;  $\text{IC}_{50} = 166.9 \mu\text{M}$ . The error  
268 bars indicate the standard deviation ( $n=3$ ).

269

270

271

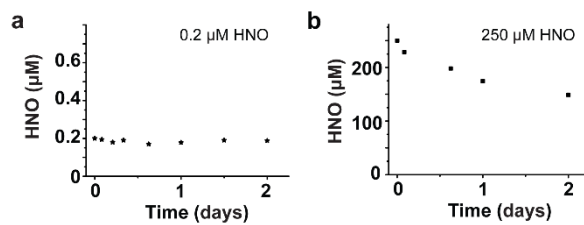

272

273 **Supplementary Figure 11. The stability of collected HNO aqueous solution: a 0.2  $\mu\text{M}$  HNO;**

274

**b 250  $\mu\text{M}$  HNO.**

275

276

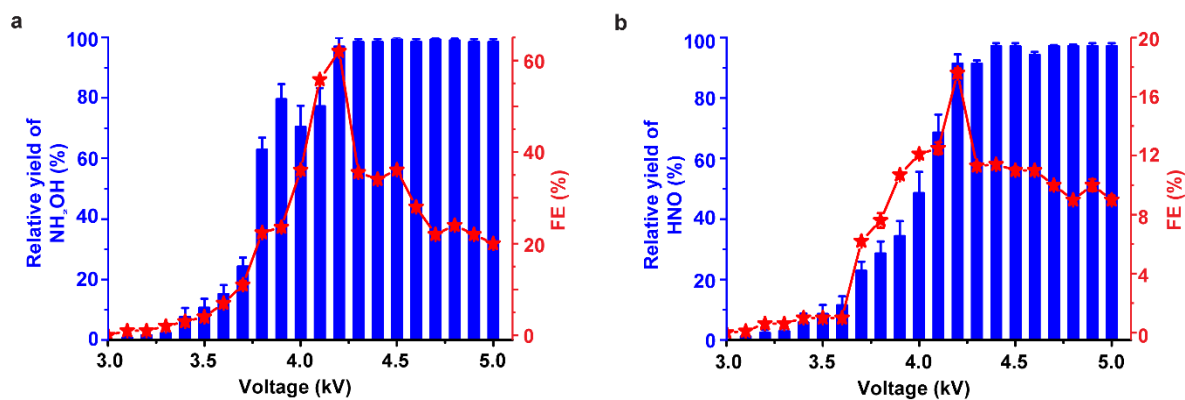

277

278 **Supplementary Figure 12. Effects of discharge voltage on the relative yields and Faradaic**  
279 **efficiency of ambient disproportionation reaction of N<sub>2</sub> with (H<sub>2</sub>O)<sub>2</sub><sup>+</sup>.** **a** NH<sub>2</sub>OH yield and  
280 Faradaic efficiency at different discharge voltages. **b** HNO yield and Faradaic efficiency at  
281 different discharge voltages. The error bars indicate the standard deviation (n=3).

282

283

284

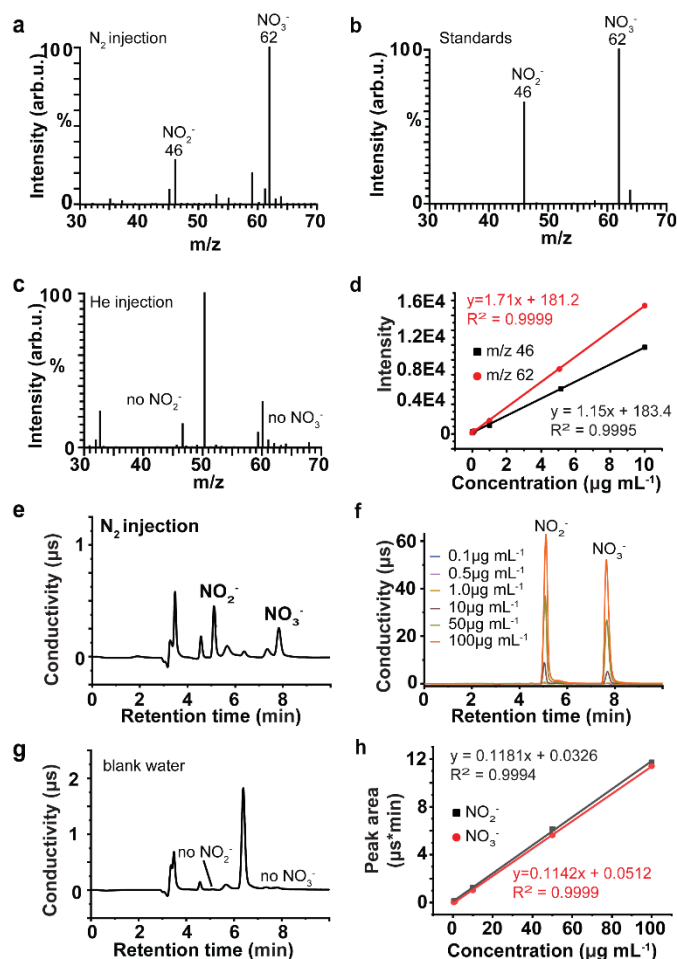

286

287 **Supplementary Figure 13. Characterization of  $NO_2^-$  and  $NO_3^-$  products by mass**  
 288 **spectrometry (a-d) and ion chromatography (e-h): a** online detection of produced species in  
 289 negative ion detection mode. **b** reference spectrum of standard compounds. **c** blank reference  
 290 spectrum; **d** calibration curve for the quantitative evaluation of  $NO_2^-$  and  $NO_3^-$  products. **e** ion  
 291 chromatogram of the collected reaction gas. **f** ion chromatography of standard compounds. **g**  
 292 reference blank ion chromatogram. **h** calibration curve.

293

294

295

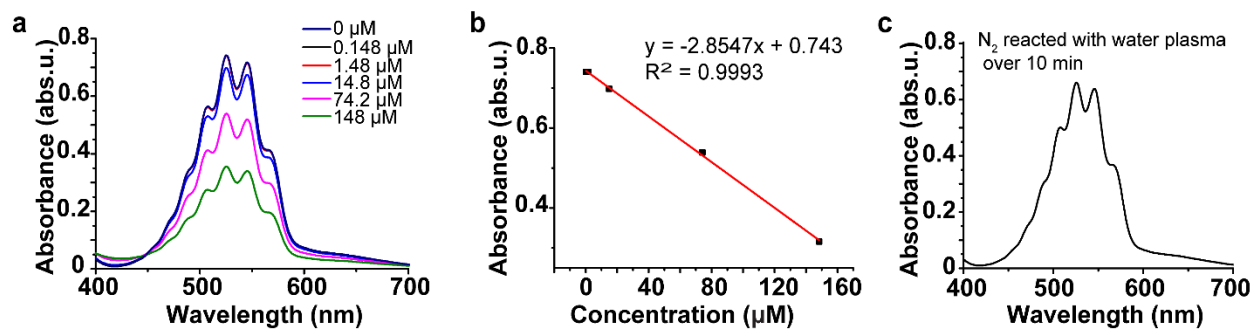

296

297

**Supplementary Figure 14. Characterization of H<sub>2</sub>O<sub>2</sub> product by UV-Vis spectroscopy.**

298

299

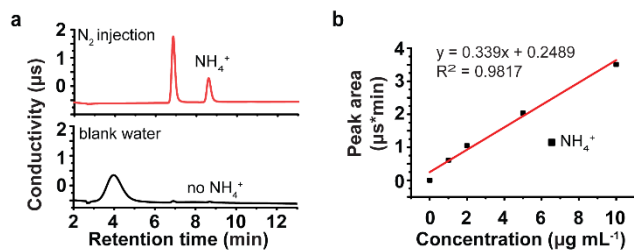

300

301 **Supplementary Figure 15. Characterization of NH<sub>4</sub><sup>+</sup> by ion chromatography.** According to  
302 the detection of NH<sub>4</sub><sup>+</sup> by ion chromatography, the concentration of NH<sub>4</sub><sup>+</sup> is  $\sim 0.36 \mu\text{g mL}^{-1}$ . The  
303 NH<sub>4</sub><sup>+</sup> production rate was about  $0.66 \mu\text{g cm}^{-2} \text{h}^{-1}$ , which was calculated by the formula: Yield =  
304  $(C \times V) / (T \times S)$ , where C is the concentration, V is the solution volume, T is the reaction time, S is  
305 the area of tip array. Because NH<sub>2</sub>OH can convert to NH<sub>3</sub> with nearly 100% efficiency, the  
306 ammonia production rate was estimated as  $\sim 1.8 \mu\text{g cm}^{-2} \text{h}^{-1}$ .

307

## 308 Supplementary references

309

- 310 1. Frisch, M. J. et al. Gaussian 16. *Revision A.03*, **Gaussian, Inc.**, Wallingford, CT (2016).
- 311 2. Neese, F. Software update: The ORCA program system—Version 5.0. *WIREs Computational Molecular*
- 312 *Science* **12**, e1606 (2022).
- 313 3. Grimme, S. Semiempirical hybrid density functional with perturbative second-order correlation. *J. Chem. Phys.*
- 314 **124**, 034108 (2006).
- 315 4. Becke, A. D., Santra, G. & Martin, J. M. L. A double-hybrid density functional based on good local physics
- 316 with outstanding performance on the GMTKN55 database. *J. Chem. Phys.* **158**, 151103 (2023).
- 317 5. Karton, A., Tarnopolsky, A., Lamère, J.-F., Schatz, G. C. & Martin, J. M. L. Highly accurate first-principles
- 318 benchmark data sets for the parametrization and validation of density functional and other approximate
- 319 methods. Derivation of a robust, generally applicable, double-hybrid functional for thermochemistry and
- 320 thermochemical kinetics. *J. Phys. Chem. A* **112**, 12868-12886 (2008).
- 321 6. Kozuch, S. & Martin, J. M. L. DSD-PBEP86: in search of the best double-hybrid DFT with spin-component
- 322 scaled MP2 and dispersion corrections. *Phys. Chem. Chem. Phys.* **13**, 20104-20107 (2011).
- 323 7. Papajak, E., Zheng, J., Xu, X., Leverentz, H. R. & Truhlar, D. G. Perspectives on basis sets beautiful: Seasonal
- 324 plantings of diffuse basis functions. *J. Chem. Theory Comput.* **7**, 3027-3034 (2011).
- 325 8. Dunning, T. H., Jr. Gaussian basis sets for use in correlated molecular calculations. I. The atoms boron through
- 326 neon and hydrogen. *J. Chem. Phys.* **90**, 1007-1023 (1989).
- 327 9. Davidson, E. R. Comment on “Comment on Dunning’s correlation-consistent basis sets”. *Chem. Phys. Lett.*
- 328 **260**, 514-518 (1996).
- 329 10. Balabin, R. M. Conformational equilibrium in alanine: Focal-point analysis and ab initio limit. *Comput. Theor.*
- 330 *Chem.* **965**, 15-21 (2011).
- 331 11. Kasalová, V., Allen, W. D., Schaefer III, H. F., Czinki, E. & Császár, A. G. Molecular structures of the two
- 332 most stable conformers of free glycine. *J. Comput. Chem.* **28**, 1373-1383 (2007).
- 333 12. Bozkaya, U., Turney, J. M., Yamaguchi, Y. & Schaefer, H. F., III. The lowest-lying electronic singlet and
- 334 triplet potential energy surfaces for the HNO–NOH system: Energetics, unimolecular rate constants, tunneling
- 335 and kinetic isotope effects for the isomerization and dissociation reactions. *J. Chem. Phys.* **136**, 164303 (2012).
- 336 13. Lee, T. J. & Taylor, P. R. A diagnostic for determining the quality of single-reference electron correlation
- 337 methods. *Int. J. Quantum Chem* **36**, 199-207 (1989).
- 338 14. Grimme, S. & Hansen, A. A practicable real-space measure and visualization of static electron-correlation
- 339 effects. *Angew. Chem. Int. Ed.* **54**, 12308-12313 (2015).
- 340 15. Pan, P.-R., Lin, Y.-S., Tsai, M.-K., Kuo, J.-L. & Chai, J.-D. Assessment of density functional approximations
- 341 for the hemibonded structure of the water dimer radical cation. *Phys. Chem. Chem. Phys.* **14**, 10705-10712
- 342 (2012).
- 343 16. Huber, K. P. & Herzberg, G. in *Molecular Spectra and Molecular Structure: IV. Constants of Diatomic*
- 344 *Molecules* (eds K. P. Huber & G. Herzberg) 8-689 (Springer US, 1979).
- 345 17. Sharpe, S. W. & Johnson, P. M. Triplet Rydberg states in molecular nitrogen. *J. Chem. Phys.* **85**, 4943-4948
- 346 (1986).
- 347 18. Cheng, Q., Evangelista, F. A., Simmonett, A. C., Yamaguchi, Y. & Schaefer, H. F., III. Water dimer radical
- 348 cation: Structures, vibrational frequencies, and energetics. *J. Phys. Chem. A* **113**, 13779-13789 (2009).
- 349 19. Wang, X.-W., Tao, X.-F., Li, X., He, Z.-Y. & Ren, L.-L. Study on the calibration method of the tip area
- 350 function of the nanoindenter at super low depth. *Acta Metrol. Sin.* **38**, 593-597 (2017).
- 351 20. Zhang, X., Ren, X., Zhong, Y., Chingin, K. & Chen, H. Rapid and sensitive detection of acetone in exhaled
- 352 breath through the ambient reaction with water radical cations. *Analyst* **146**, 5037-5044 (2021).
- 353 21. Zhang, X. et al. Mass spectrometry distinguishing C=C location and cis/trans isomers: a strategy initiated by
- 354 water radical cations. *Anal. Chim. Acta* **1139**, 146-154 (2020).
- 355 22. Yang, W. et al. Determination of C=C Positions of Unsaturated Fatty Acids in Foods via Ambient Reactive
- 356 Desorption Ionization with Water Dimer Radical Cations. *J. Agric. Food. Chem.* **72**, 845-856 (2024).
- 357 23. Mao, G.-J. et al. A highly sensitive and reductant-resistant fluorescent probe for nitroxyl in aqueous solution
- 358 and serum. *Chem. Commun.* **50**, 5790-5792 (2014).
- 359 24. Hu, Y., Chen, G. Z., Zhuang, L., Wang, Z. & Jin, X. Indirect electrosynthesis of ammonia from nitrogen and
- 360 water by a magnesium chloride cycle at atmospheric pressure. *Cell Rep. Phys. Sci.* **2** (2021).
- 361 25. Zhu, D., Zhang, L., Ruther, R. E. & Hamers, R. J. Photo-illuminated diamond as a solid-state source of
- 362 solvated electrons in water for nitrogen reduction. *Nat. Mater.* **12**, 836-841 (2013).



363  
364  
365
